# Supplementary material
Source: publisher figshare collection journal article supplement (https://acs.figshare.com/ndownloader/files/3952465)
Supplement: Supplementary file 1 [file 3952465]

## Sheet: MP2
		Molecular Dynamics of Methanol Monocation (CH3OH+) in Strong Laser Fields Bishnu Thapa and H. Bernhard Schlegel Department of Chemistry, Wayne State University, Detroit, MI 48202, U.S.A.
		Parent Molecule	Level of Theory	Discription	Entities		Total Energy					Reaction Energy								Barrier Energy						a.u. -> kcal/mol
												Reaction Energy in a.u.			Reaction Energy in kcal/mol					Barrier Energy in a.u.			Barrier Energy in kcal/mol
							E (0K)	Enthalpy (298K)				E (0K)	Enthalpy (298K)		E (0K)	Enthalpy (298K)				E (0K)	Enthalpy (298K)		E (0K)	Enthalpy (298K)		627.51
		CH3OH+	MP2/6-31G(d,p)	Minimum
					CH3OH+ (Eclipsed)		-114.939	-114.935		CH3OH+ -> CH2OH2+		-0.020954	-0.020453		-13.1488	-12.8345		CH3OH+ -> TS1		0.036176	0.036179		22.7008	22.7027
					CH3OH+ (Staggered)		-114.938	-114.934		CH3OH+ -> CH2OH+ + H		0.0123151	0.0121751		7.72784	7.63999		CH3OH+ -> TS2		0.050256	0.050503		31.5361	31.6911
					CH2OH2+		-114.959	-114.955		CH3OH+ -> CH3O+ + H		0.152593	0.152565		95.7536	95.736
					CH3O+		-114.288	-114.284		CH3OH+ -> CH3+ + OH		0.101205	0.10431		63.5071	65.4555
					CH2OH+		-114.428	-114.424		CH3OH+ -> CH2+ + H2O		0.10848	0.112075		68.0722	70.3281
					HCOH+ (Cis)		-113.753	-113.75		CH3OH+ -> HCOH+ + H2 (Cis)		0.03793	0.04112		23.8014	25.8032
					HCOH+ (Trans)		-113.76	-113.756		CH3OH+ -> HCOH+ + H2 (Trans)		0.031644	0.034821		19.8569	21.8505
					CH3+		-39.314	-39.3102
					CH2 +		-38.6321	-38.6283
					H2O		-76.1979	-76.1941
					OH		-75.5233	-75.52
					H2		-1.14716	-1.14386
					H		-0.498233	-0.498233
				Products
					CH2OH+ + H		-114.926	-114.922
					CH3O+ + H		-114.786	-114.782
					CH3+ + OH		-114.837	-114.83
					CH2+ + H2O		-114.83	-114.822
					HCOH+ + H2 (Cis)		-114.901	-114.893
					HCOH+ + H2 (Trans)		-114.907	-114.9
				TS
					TS1 (CH2OH2+)		-114.902	-114.898
					TS2 (HCOH+ + H2)		-114.888	-114.884
			MP2/6-311++G(d,p)	Minimum
					CH3OH+ (Eclipsed)		-114.994	-114.99		CH3OH+ -> CH2OH2+		-0.020746	-0.020544		-13.0183	-12.8916		CH3OH+ -> TS1		0.035889	0.035606		22.5207	22.3431
					CH3OH+ (Staggered)		-114.993	-114.988		CH3OH+ -> CH2OH+ + H		0.0133271	0.0128841		8.36287	8.08489		CH3OH+ -> TS2		0.04653	0.046489		29.198	29.1723
					CH2OH2+		-115.015	-115.01		CH3OH+ -> CH3O+ + H		0.153448	0.153127		96.2901	96.0887
					CH2OH+		-114.481	-114.477		CH3OH+ -> CH3+ + OH		0.098116	0.100917		61.5687	63.3264
					CH3O+		-114.341	-114.337		CH3OH+ -> CH2+ + H2O		0.098398	0.101693		61.7457	63.8133
					HCOH+ (Cis)		-113.805	-113.801		CH3OH+ -> HCOH+ + H2 (Cis)		0.038573	0.041461		24.2049	26.0172
					HCOH+ (Trans)		-113.811	-113.808		CH3OH+ -> HCOH+ + H2 (Trans)		0.032438	0.035319		20.3552	22.163
					CH3+		-39.3245	-39.3207
					CH2 +		-38.6422	-38.6384
					H2O		-76.2532	-76.2495
					OH		-75.5712	-75.5679
					H2		-1.14997	-1.14667
					H		-0.499818	-0.499818
				Products
					CH2OH+ + H		-114.98	-114.977
					CH3O+ + H		-114.84	-114.836
					CH3+ + OH		-114.896	-114.889
					CH2+ + H2O		-114.895	-114.888
					HCOH+ + H2 (Cis)		-114.955	-114.948
					HCOH+ + H2 (Trans)		-114.961	-114.954
				TS
					TS1 (CH2OH2+)		-114.958	-114.954
					TS2 (HCOH+ + H2)		-114.947	-114.943

## Sheet: B3LYP
		Molecular Dynamics of Methanol Monocation (CH3OH+) in Strong Laser Fields Bishnu Thapa and H. Bernhard Schlegel Department of Chemistry, Wayne State University, Detroit, MI 48202, U.S.A.
		Parent Molecule	Level of Theory	Discription	Entities		Total Energy					Reaction Energy								Barrier Energy						a.u. -> kcal/mol
												Reaction Energy in a.u.			Reaction Energy in kcal/mol					Barrier Energy in a.u.			Barrier Energy in kcal/mol
							E(0K)	Enthalpy (298K)				E (0K)	Enthalpy (298K)		E (0K)	Enthalpy (298K)				E (0K)	Enthalpy (298K)		E (0K)	Enthalpy (298K)		627.51
		CH3OH	B3LYP/6-31G(d,p)	Minimum
					CH3OH		-115.673	-115.668		CH3OH -> CH2OH2		0.134995	0.135924		84.7106	85.2936		CH3OH -> TS1		0.133989	0.13443		84.0794	84.3561
					CH2 OH2		-115.538	-115.532		CH3OH -> CH2OH + H		0.148994	0.148994		93.4953	93.4953		CH3OH -> TS2		0.135775	0.135709		85.2001	85.1587
					CH2OH		-115.023	-115.019		CH3OH -> CH3O + H		0.154294	0.154012		96.8211	96.6441
					CH3O		-115.018	-115.014		CH3OH -> CH3 + OH		0.139357	0.14246		87.4478	89.395
					CH3		-39.8131	-39.8091		CH3OH -> HCOH + H2		0.121857	0.124763		76.4664	78.29
					HCOH		-114.382	-114.378
					OH		-75.7201	-75.7168
					H2		-1.16837	-1.16506
					H		-0.500273	-0.500273
				Products
					CH2OH + H		-115.524	-115.519
					CH3O + H		-115.518	-115.514
					CH3 + OH		-115.533	-115.526
					HCOH + H2		-115.551	-115.544
				TS
					TS1 (CH2OH2)		-115.539	-115.534
					TS2 (HCOH + H2)		-115.537	-115.533
		CH3OH+	B3LYP/6-31G(d,p)	Minimum
					CH3OH+ (Eclipsed)		-115.293	-115.289		CH3OH+ -> CH2OH2+		-0.000965	-0.000716		-0.605547	-0.449297		CH3OH+ -> TS1		0.048835	0.048519		30.6444	30.4461
					CH3OH+ (Staggered)		-115.292	-115.288		CH3OH+ -> CH2OH+ + H		0.0427772	0.0422842		26.8431	26.5337		CH3OH+ -> TS2		0.056278	0.056253		35.315	35.2993
					CH2OH2+		-115.294	-115.29		CH3OH+ -> CH3O+ + H		0.156294	0.155904		98.0761	97.8314
					CH2OH+		-114.75	-114.746		CH3OH+ -> CH3+ + OH		0.120044	0.122789		75.3288	77.0513
					CH3O+		-114.637	-114.633		CH3OH+ -> CH2+ + H2O		0.135387	0.138634		84.9566	86.9942
					HCOH+ (Cis)		-114.068	-114.064		CH3OH+ -> HCOH+ + H2 (Cis)		0.05727	0.060116		35.9375	37.7234
					HCOH+ (Trans)		-114.073	-114.07		CH3OH+ -> HCOH+ + H2 (Trans)		0.051556	0.054386		32.3519	34.1277
					CH3+		-39.4533	-39.4495
					CH2 +		-38.7597	-38.7558
					H2O		-76.3984	-76.3946
					OH		-75.7201	-75.7168
					H2		-1.16837	-1.16506
					H		-0.500273	-0.500273
				Products
					CH2OH+ + H		-115.251	-115.247
					CH3O+ + H		-115.137	-115.133
					CH3+ + OH		-115.173	-115.166
					CH2+ + H2O		-115.158	-115.15
					HCOH+ + H2 (Cis)		-115.236	-115.229
					HCOH+ + H2 (Trans)		-115.242	-115.235
				TS
					TS1 (CH2OH2+)		-115.245	-115.241
					TS2 (HCOH+ + H2)		-115.237	-115.233
			B3LYP/6-311++G(d,p)	Minimum
					CH3OH+ (Eclipsed)		-115.324	-115.32		CH3OH+ -> CH2OH2+		-0.002411	-0.002115		-1.51293	-1.32718		CH3OH+ -> TS1		0.048339	0.048042		30.3332	30.1468
					CH3OH+ (Staggered)		-115.323	-115.319		CH3OH+ -> CH2OH+ + H		0.040611	0.040128		25.4838	25.1807		CH3OH+ -> TS2		0.053435	0.053439		33.531	33.5335
					CH2OH2+		-115.327	-115.322		CH3OH+ -> CH3O+ + H		0.155165	0.154793		97.3675	97.1341
					CH2OH+		-114.782	-114.778		CH3OH+ -> CH3+ + OH		0.110204	0.092725		69.1541	58.1858
					CH3O+		-114.667	-114.663		CH3OH+ -> CH2+ + H2O		0.120429	0.12369		75.5703	77.6167
					HCOH+ (Cis)		-114.099	-114.095		CH3OH+ -> HCOH+ + H2 (Cis)		0.056007	0.058863		35.1449	36.9371
					HCOH+ (Trans)		-114.105	-114.101		CH3OH+ -> HCOH+ + H2 (Trans)		0.050355	0.053195		31.5982	33.3804
					CH3+		-39.4603	-39.4565
					CH2 +		-38.7668	-38.763
					H2O		-76.4372	-76.4335
					OH		-75.754	-75.7709
					H2		-1.16951	-1.1662
					H		-0.502257	-0.502257
				Products
					CH2OH+ + H		-115.284	-115.28
					CH3O+ + H		-115.169	-115.165
					CH3+ + OH		-115.214	-115.227
					CH2+ + H2O		-115.204	-115.196
					HCOH+ + H2 (Cis)		-115.268	-115.261
					HCOH+ + H2 (Trans)		-115.274	-115.267
				TS
					TS1 (CH2OH2+)		-115.276	-115.272
					TS2 (HCOH+ + H2)		-115.271	-115.267
		CH3OH+ + (Singlet)	B3LYP/6-31G(d,p)	Minimum
					CH3OH2+ (Eclipsed)		-114.626	-114.621		CH3OH 2+ -> CH2OH22+		-0.085151	-0.085528		-53.4331	-53.6696		CH3OH2+ -> TS1		0.0304	0.030677		19.0763	19.2501
					CH3OH2+ (Staggered)		-114.622	-114.618		CH3OH2+ -> CH2OH+ + H+		-0.12468	-0.125199		-78.2379	-78.5636		CH3OH2+ -> TS2		0.021355	0.021582		13.4005	13.5429
					CH2OH22+		-114.711	-114.707		CH3OH2+ -> CH3O+ + H+		0.005582	0.005393		3.50276	3.38416		CH3OH2+ -> TS3		0.008132	0.003748		5.10291	2.35191
					CH2OH+		-114.75	-114.746		CH3OH2+ -> CHOH2+ + H+		0.00076	0.000463		0.476907	0.290537		CH3OH2+ -> TS4		0.079786	0.080392		50.0665	50.4467
					CH3O+		-114.62	-114.616		CH3OH2+ -> CH3+ + OH+		-0.043093	-0.040375		-27.0413	-25.3357		CH3OH2+ -> TS5		0.055827	0.05677		35.032	35.6237
					CHOH2+		-114.625	-114.621		CH3OH2+ -> CH2+ + H2O+		-0.084319	-0.081095		-52.911	-50.8879
					CH3+		-39.4533	-39.4495		CH3OH2+ -> HCOH2+ + H2		0.03659	-0.607641		22.9606	-381.301
					CH2+		-38.7597	-38.7558		CH3OH2+ -> HCOH+ + H2+		-0.042495	-0.039676		-26.666	-24.8971
					HCOH2+		-113.421	-114.064
					HCOH+		-114.068	-114.064
					H2O+		-75.9503	-75.9466
					OH+		-75.2155	-75.2122
					H2		-1.16837	-1.16506
					H2+		-0.600401	-0.597096
					H+		0	0
				Products
					CH2OH+ + H+		-114.75	-114.746
					CH3O+ + H+		-114.62	-114.616
					CHOH2+ + H+		-114.625	-114.621
					CH3+ + OH+		-114.669	-114.662
					CH2+ + H2O+		-114.71	-114.702
					HCOH2+ + H2		-114.589	-115.229
					HCOH+ + H2+		-114.668	-114.661
				TS
					TS1		-114.595	-114.591				TS1: CH3OH2+ -> CH2OH22+
					TS2		-114.604	-114.6				TS2: CH3OH2+ -> CH2OH+ + H+
					TS3		-114.618	-114.618				TS3: CH2OH22+ -> CH2OH+ + H+
					TS4		-114.546	-114.541				TS4: CH2OH22+ -> CHOH2+ + H+
					TS5		-114.57	-114.565				TS5: CH2OH22+ -> CH2+ + H2O+
		CH3OH+ + (Triplet)	B3LYP/6-31G(d,p)	Minimum
					CH3OH2+		-114.562	-114.557		CH3OH2+ -> CH2OH22+		-0.008491	-0.008924		-5.32818	-5.59989		CH3OH2+ -> TS1		0.055716	0.055338		34.9623	34.7251
					CH2OH22+		-114.571	-114.566		CH3OH2+ -> CH2OH+ + H+		-0.050588	-0.051213		-31.7445	-32.1366		CH3OH2+ -> TS2		0.030895	0.031195		19.3869	19.5752
					CH2OH+		-114.613	-114.609		CH3OH2+ -> CH3O+ + H+		-0.074594	-0.075417		-46.8084	-47.3249		CH3OH2+ -> TS3		0.04241	0.042329		26.6127	26.5618
					CH3O+		-114.637	-114.633		CH3OH2+ -> CHOH2+ + H+		-0.045737	-0.046147		-28.7004	-28.9577		CH3OH2+ -> TS4		0.058226	0.058488		36.5374	36.7018
					CHOH2+		-114.608	-114.604		CH3OH2+ -> CH3+ + OH+		-0.136542	-0.134229		-85.6814	-84.23		CH3OH2+ -> TS5		0.023084	0.023391		14.4854	14.6781
					CH3+		-39.4533	-39.4495		CH3OH2+ -> CH2+ + H2O+		-0.14775	-0.144932		-92.7145	-90.9462		CH3OH2+ -> TS6		0.05571	0.055331		34.9586	34.7207
					CH2+		-38.7597	-38.7558		CH3OH2+ -> HCOH+ + H2+		-0.105926	-0.103513		-66.4696	-64.9554		CH3OH2+ -> TS7		0.035125	0.030335		22.0413	19.0355
					HCOH+		-114.068	-114.064										CH3OH2+ -> TS8		0.048898	0.049406		30.684	31.0027
					H2O+		-75.9503	-75.9466
					OH+		-75.2455	-75.2422
					H2+		-0.600401	-0.597096
					H+		0	0
				Products
					CH2OH+ + H+		-114.613	-114.609
					CH3O+ + H+		-114.637	-114.633
					CHOH2+ + H+		-114.608	-114.604
					CH3+ + OH+		-114.699	-114.692
					CH2+ + H2O+		-114.71	-114.702
					HCOH+ + H2+		-114.668	-114.661
				TS
					TS1		-114.507	-114.502				TS1: CH3OH2+ -> CH2OH22+
					TS2		-114.531	-114.526				TS2: CH3OH2+ -> CH2OH+ + H+
					TS3		-114.52	-114.515				TS3: CH2OH22+ -> CH2OH+ + H+
					TS4		-114.504	-114.499				TS4: CH3OH2+ -> CH3O+ + H+
					TS5		-114.539	-114.534				TS5: CH2OH22+ -> CHOH2+ + H+
					TS6		-114.507	-114.502				TS6: CH3OH2+ -> CH3+ + OH+
					TS7		-114.527	-114.527				TS7: CH2OH22+ -> CH2+ + H2O+
					TS8		-114.513	-114.508				TS8: CH2OH22+ -> HCOH+ + H2+

## Sheet: CAM-B3LYP
		Molecular Dynamics of Methanol monocation (CH3OH+) in Strong Laser Fields Bishnu Thapa and H. Bernhard Schlegel Department of Chemistry, Wayne State University, Detroit, MI 48202, U.S.A.
		Parent Molecule	Level of Theory	Discription	Entities		Total Energy					Reaction Energy								Barrier Energy						a.u. -> kcal/mol
												Reaction Energy in a.u.			Reaction Energy in kcal/mol					Barrier Energy in a.u.			Barrier Energy in kcal/mol
							E (0K)	Enthalpy (298K)				E (0K)	Enthalpy (298K)		E (0K)	Enthalpy (298K)				E (0K)	Enthalpy (298K)		E (0K)	Enthalpy (298K)		627.51
		CH3OH	CAM-B3LYP/6-31G(d,p)	Minimum
					CH3OH		-115.618	-115.613		CH3OH -> CH2OH2		0.138121	0.138981		86.6722	87.2119		CH3OH -> TS1		0.137591	0.137951		86.3397	86.5656
					CH2 OH2		-115.479	-115.474		CH3OH -> CH2OH + H		0.147483	0.156023		92.547	97.9059		CH3OH -> TS2		0.14228	0.142193		89.2821	89.2275
					CH2OH		-114.971	-114.967		CH3OH -> CH3O + H		0.154323	0.156023		96.8391	97.9059
					CH3O		-114.964	-114.96		CH3OH -> CH3 + OH		0.142697	0.145788		89.5437	91.4834
					CH3		-39.7814	-39.7774		CH3OH -> HCOH + H2		0.126774	0.129676		79.5519	81.3729
					HCOH		-114.331	-114.327
					OH		-75.6934	-75.6901
					H2		-1.15989	-1.15659
					H		-0.498827	-0.496827
				Products
					CH2OH + H		-115.47	-115.457
					CH3O + H		-115.463	-115.457
					CH3 + OH		-115.475	-115.468
					HCOH + H2		-115.491	-115.484
				TS
					TS1 (CH2OH2)		-115.48	-115.475
					TS2 (HCOH + H2)		-115.475	-115.471
		CH3OH+	CAM-B3LYP/6-31G(d,p)	Minimum
					CH3OH+ (Eclipsed)		-115.237	-115.232		CH3OH+ -> CH2OH2+		-0.004363	-0.004115		-2.73782	-2.5822		CH3OH+ -> TS1		0.047404	0.047065		29.7465	29.5337
					CH3OH+ (Staggered)		-115.235	-115.232		CH3OH+ -> CH2OH+ + H		0.039895	0.041391		25.0345	25.9732		CH3OH+ -> TS2		0.058562	0.058525		36.7482	36.725
					CH2OH2+		-115.241	-115.236		CH3OH+ -> CH3O+ + H		0.156111	0.15771		97.9611	98.9645
					CH2OH+		-114.698	-114.694		CH3OH+ -> CH3+ + OH		0.122111	0.124848		76.6258	78.3433
					CH3O+		-114.582	-114.578		CH3OH+ -> CH2+ + H2O		0.136775	0.140015		85.8276	87.8607
					HCOH+ (Cis)		-114.018	-114.014		CH3OH+ -> HCOH+ + H2 (Cis)		0.058783	0.061617		36.8869	38.6653
					HCOH+ (Trans)		-114.024	-114.02		CH3OH+ -> HCOH+ + H2 (Trans)		0.052993	0.055812		33.2536	35.0226
					CH3+		-39.4211	-39.4173
					CH2 +		-38.7303	-38.7265
					H2O		-76.3695	-76.3657
					OH		-75.6934	-75.6901
					H2		-1.15989	-1.15659
					H		-0.498827	-0.496827
				Products
					CH2OH+ + H		-115.197	-115.191
					CH3O+ + H		-115.08	-115.075
					CH3+ + OH		-115.114	-115.107
					CH2+ + H2O		-115.1	-115.092
					HCOH+ + H2 (Cis)		-115.178	-115.171
					HCOH+ + H2 (Trans)		-115.184	-115.176
				TS
					TS1 (CH2OH2+)		-115.189	-115.185
					TS2 (HCOH+ + H2)		-115.178	-115.174
			CAM-B3LYP/6-311++G(d,p)	Minimum
					CH3OH+ (Eclipsed)		-115.268	-115.264		CH3OH+ -> CH2OH2+		-0.005835	-0.005518	627.51	-3.66152	-3.4626		CH3OH+ -> TS1		0.046919	0.046605		29.4421	29.2451
					CH3OH+ (Staggered)		-115.267	-115.263		CH3OH+ -> CH2OH+ + H		0.0395767	0.0390887		24.8347	24.5285		CH3OH+ -> TS2		0.05541	0.055415		34.7703	34.7734
					CH2OH2+		-115.274	-115.269		CH3OH+ -> CH3O+ + H		0.156892	0.156515		98.451	98.2144
					CH2OH+		-114.73	-114.726		CH3OH+ -> CH3+ + OH		0.112029	0.114781		70.2993	72.0262
					CH3O+		-114.612	-114.608		CH3OH+ -> CH2+ + H2O		0.121543	0.124803		76.2694	78.3151
					HCOH+ (Cis)		-114.049	-114.046		CH3OH+ -> HCOH+ + H2 (Cis)		0.057397	0.060249		36.0172	37.8068
					HCOH+ (Trans)		-114.055	-114.051		CH3OH+ -> HCOH+ + H2 (Trans)		0.05164	0.054478		32.4046	34.1855
					CH3+		-39.4282	-39.4244
					CH2 +		-38.7376	-38.7337
					H2O		-76.4089	-76.4051
					OH		-75.7278	-75.7245
					H2		-1.1611	-1.15779
					H		-0.498913	-0.498913
				Products
					CH2OH+ + H		-115.228	-115.225
					CH3O+ + H		-115.111	-115.107
					CH3+ + OH		-115.156	-115.149
					CH2+ + H2O		-115.146	-115.139
					HCOH+ + H2 (Cis)		-115.211	-115.203
					HCOH+ + H2 (Trans)		-115.216	-115.209
				TS
					TS1 (CH2OH2+)		-115.221	-115.217
					TS2 (HCOH+ + H2)		-115.213	-115.208
		CH3OH+ + (Singlet)	CAM-B3LYP/6-31G(d,p)	Minimum
					CH3OH2+ (Eclipsed)		-114.569	-114.565		CH3OH 2+ -> CH2OH22+		-0.088651	-0.089003		-55.6293	-55.8502		CH3OH2+ -> TS1		0.028307	0.028633		17.7629	17.9675
					CH3OH2+ (Staggered)		-114.564	-114.56		CH3OH2+ -> CH2OH+ + H+		-0.128902	-0.129391		-80.8872	-81.1941		CH3OH2+ -> TS2		0.023141	0.023384		14.5212	14.6737
					CH2OH22+		-114.658	-114.654		CH3OH2+ -> CH3O+ + H+		0.005436	0.005233		3.41114	3.28376		CH3OH2+ -> TS3		0.000745	0.000943		0.467495	0.591741
					CH2OH+		-114.698	-114.694		CH3OH2+ -> CHOH2+ + H+		-0.00304	-0.003324		-1.90763	-2.08584		CH3OH2+ -> TS4		0.085651	0.08627		53.7468	54.1352
					CH3O+		-114.564	-114.559		CH3OH2+ -> CH3+ + OH+		-0.040724	-0.037973		-25.5547	-23.8284		CH3OH2+ -> TS5		0.0608	0.061743		38.1526	38.7443
					CHOH2+		-114.572	-114.568		CH3OH2+ -> CH2+ + H2O+		-0.083235	-0.079978		-52.2308	-50.187
					CH3+		-39.4211	-39.4173		CH3OH2+ -> HCOH2+ + H2		0.036466	0.039268		22.8828	24.641
					CH2+		-38.7303	-38.7265		CH3OH2+ -> HCOH+ + H2+		-0.043718	-0.040869		-27.4335	-25.6457
					HCOH2+		-113.373	-113.369
					HCOH+ (Cis)		-114.018	-114.014
					H2O+		-75.9219	-75.9181
					OH+		-75.1886	-75.1853
					H2		-1.15989	-1.15659
					H2+		-0.594783	-0.591478
					H+		0	0
				Products
					CH2OH+ + H+		-114.698	-114.694
					CH3O+ + H+		-114.564	-114.559
					CHOH2+ + H+		-114.572	-114.568
					CH3+ + OH+		-114.61	-114.603
					CH2+ + H2O+		-114.652	-114.645
					HCOH2+ + H2		-114.533	-114.525
					HCOH+ + H2+		-114.613	-114.605
				TS
					TS1		-114.541	-114.536				TS1: CH3OH2+ -> CH2OH22+
					TS2		-114.546	-114.541				TS2: CH3OH2+ -> CH2OH+ + H+
					TS3		-114.568	-114.564				TS3: CH2OH22+ -> CH2OH+ + H+
					TS4		-114.483	-114.478				TS4: CH2OH22+ -> CHOH2+ + H+
					TS5		-114.508	-114.503				TS5: CH2OH22+ -> CH2+ + H2O+
		CH3OH+ + (Triplet)	CAM-B3LYP/6-31G(d,p)	Minimum
					CH3OH2+		-114.505	-114.501		CH3OH2+ -> CH2OH22+		-0.011048	-0.011526		-6.93272	-7.23267		CH3OH2+ -> TS1		0.055053	0.054643		34.5463	34.289
					CH2OH22+		-114.516	-114.512		CH3OH2+ -> CH2OH+ + H+		-0.053152	-0.053808		-33.3534	-33.765		CH3OH2+ -> TS2		0.042988	0.043369		26.9754	27.2145
					CH2OH+		-114.559	-114.554		CH3OH2+ -> CH3O+ + H+		-0.076227	-0.077098		-47.8332	-48.3797		CH3OH2+ -> TS3		0.051149	0.051186		32.0965	32.1197
					CH3O+		-114.582	-114.578		CH3OH2+ -> CHOH2+ + H+		-0.051783	-0.052239		-32.4943	-32.7805		CH3OH2+ -> TS4		0.057486	0.057661		36.073	36.1828
					CHOH2+		-114.557	-114.553		CH3OH2+ -> CH3+ + OH+		-0.135211	-0.132944		-84.8462	-83.4236		CH3OH2+ -> TS5		0.030885	0.03132		19.3806	19.6536
					CH3+		-39.4211	-39.4173		CH3OH2+ -> CH2+ + H2O+		-0.146777	-0.144004		-92.104	-90.3639		CH3OH2+ -> TS6		0.057467	0.057417		36.0611	36.0297
					CH2+		-38.7303	-38.7265		CH3OH2+ -> HCOH+ + H2+		-0.10726	-0.104895		-67.3067	-65.8226		CH3OH2+ -> TS7		0.032858	0.032552		20.6187	20.4267
					HCOH+		-114.018	-114.014										CH3OH2+ -> TS8		0.051724	0.052338		32.4573	32.8426
					H2O+		-75.9219	-75.9181
					OH+		-75.2196	-75.2162
					H2+		-0.594783	-0.591478
					H+		0	0
				Products
					CH2OH+ + H+		-114.559	-114.554
					CH3O+ + H+		-114.582	-114.578
					CHOH2+ + H+		-114.557	-114.553
					CH3+ + OH+		-114.641	-114.634
					CH2+ + H2O+		-114.652	-114.645
					HCOH+ + H2+		-114.613	-114.605
				TS
					TS1		-114.45	-114.446				TS1: CH3OH2+ -> CH2OH22+
					TS2		-114.462	-114.457				TS2: CH3OH2+ -> CH2OH+ + H+
					TS3		-114.454	-114.449				TS3: CH2OH22+ -> CH2OH+ + H+
					TS4		-114.448	-114.443				TS4: CH3OH2+ -> CH3O+ + H+
					TS5		-114.475	-114.469				TS5: CH2OH22+ -> CHOH2+ + H+
					TS6		-114.448	-114.443				TS6: CH3OH2+ -> CH3+ + OH+
					TS7		-114.473	-114.468				TS7: CH2OH22+ -> CH2+ + H2O+
					TS8		-114.454	-114.448				TS8: CH2OH22+ -> HCOH+ + H2+

## Sheet: CBS-QB3
		Molecular Dynamics of Methanol Monocation (CH3OH+) in Strong Laser Fields Bishnu Thapa and H. Bernhard Schlegel Department of Chemistry, Wayne State University, Detroit, MI 48202, U.S.A.
		Parent Molecule	Level of Theory	Discription	Entities		Total Energy					Reaction Energy								Barrier Energy						a.u. -> kcal/mol
												Reaction Energy in a.u.			Reaction Energy in kcal/mol					Barrier Energy in a.u.			Barrier Energy in kcal/mol
							E (0K)	Enthalpy (298K)				E (0K)	Enthalpy (298K)		E (0K)	Enthalpy (298K)				E (0K)	Enthalpy (298K)		E (0K)	Enthalpy (298K)		627.51
		CH3OH	CBS-QB3	Minimum														CH3OH -> TS1		0.134511	0.134861		84.4069	84.6266
					CH3OH		-115.54	-115.536		CH3OH -> CH2OH2		0.132756	0.133653		83.3057	83.8685		CH3OH -> TS2		0.141219	0.141161		88.6163	88.5799
					CH2 OH2		-115.407	-115.402		CH3OH -> CH2OH + H		0.151973	0.154361		95.3645	96.863
					CH2OH		-114.888	-114.884		CH3OH -> CH3O + H		0.165637	0.167715		103.939	105.243
					CH3O		-114.874	-114.871		CH3OH -> CH3 + OH		0.145414	0.148474		91.2487	93.1688
					CH3		-39.7448	-39.7408		CH3OH -> HCOH + H2		0.121046	0.123936		75.9575	77.771
					HCOH		-114.253	-114.249
					OH		-75.6497	-75.6464
					H2		-1.16608	-1.16278
					H		-0.499818	-0.497457
				Products
					CH2OH + H		-115.388	-115.381
					CH3O + H		-115.374	-115.368
					CH3 + OH		-115.395	-115.387
					HCOH + H2		-115.419	-115.412
				TS
					TS1 (CH2OH2)		-115.405	-115.401
					TS2 (HCOH + H2)		-115.399	-115.395
		CH3OH+	CBS-QB3	Minimum														CH3OH+ -> TS1		0.040397	0.040085		25.3495	25.1537
					CH3OH+ (Eclipsed)		-115.139	-115.134		CH3OH+ -> CH2OH2+		-0.010578	-0.010324		-6.6378	-6.47841		CH3OH+ -> TS2		0.050442	0.050429		31.6528	31.6447
					CH3OH+ (Staggered)		-115.138	-115.134		CH3OH+ -> CH2OH+ + H		0.027097	0.028955		17.0036	18.1695
					CH2OH2+		-115.149	-115.145		CH3OH+ -> CH3O+ + H		0.159798	0.161769		100.275	101.512
					CH2OH+		-114.612	-114.608		CH3OH+ -> CH3+ + OH		0.104267	0.107001		65.4285	67.1441
					CH3O+		-114.479	-114.475		CH3OH+ -> CH2+ + H2O		0.110976	0.114215		69.6385	71.671
					HCOH+ (Cis)		-113.926	-113.923		CH3OH+ -> HCOH+ + H2 (Cis)		0.046121	0.048958		28.9414	30.7216
					HCOH+ (Trans)		-113.932	-113.928		CH3OH+ -> HCOH+ + H2 (Trans)		0.040503	0.043324		25.416	27.1862
					CH3+		-39.3846	-39.3808
					CH2 +		-38.6902	-38.6863
					H2O		-76.3375	-76.3337
					OH		-75.6497	-75.6464
					H2		-1.16608	-1.16278
					H		-0.499818	-0.497457
				Products
					CH2OH+ + H		-115.112	-115.105
					CH3O+ + H		-114.979	-114.972
					CH3+ + OH		-115.034	-115.027
					CH2+ + H2O		-115.028	-115.02
					HCOH+ + H2 (Cis)		-115.093	-115.085
					HCOH+ + H2 (Trans)		-115.098	-115.091
				TS
					TS1 (CH2OH2+)		-115.098	-115.094
					TS2 (HCOH+ + H2)		-115.088	-115.084
		CH3OH++ (Singlet)	CBS-QB3	Minimum
					CH3OH2+ (Eclipsed)		-114.486	-114.481		CH3OH 2+ -> CH2OH22+		-0.081004	-0.08145		-50.8308	-51.1106		CH3OH2+ -> TS1		0.031758	0.031975		19.9284	20.0646
					CH3OH2+ (Staggered)		-114.481	-114.477		CH3OH2+ -> CH2OH+ + H+		-0.125863	-0.126453		-78.9802	-79.3505		CH3OH2+ -> TS2		0.03005	0.030281		18.8567	19.0016
					CH2OH22+		-114.567	-114.563		CH3OH2+ -> CH3O+ + H+		0.01026	0.010018		6.43825	6.28639		CH3OH2+ -> TS3		0.00658	0.006694		4.12901	4.20055
					CH2OH+		-114.612	-114.608		CH3OH2+ -> CHOH2+ + H+		-0.001264	-0.001657		-0.793172	-1.03978		CH3OH2+ -> TS4		0.095837	0.096372		60.1386	60.4743
					CH3O+		-114.476	-114.471		CH3OH2+ -> CH3+ + OH+		-0.071643	-0.068997		-44.9567	-43.2963		CH3OH2+ -> TS5		0.066358	0.067231		41.6403	42.1881
					CHOH2+		-114.487	-114.483		CH3OH2+ -> CH2+ + H2O+		-0.076809	-0.073652		-48.1984	-46.2173
					CH3+		-39.3846	-39.3808		CH3OH2+ -> HCOH2+ + H2		0.029787	0.032515		18.6916	20.4035
					CH2+		-38.6902	-38.6863		CH3OH2+ -> HCOH+ + H2+		-0.037361	-0.034611		-23.4444	-21.7187
					HCOH2+		-113.29	-113.286
					HCOH+		-113.926	-113.923
					H2O+		-75.8725	-75.8687
					OH+		-75.1729	-75.1695
					H2		-1.16608	-1.16278
					H2+		-0.596786	-0.593481
					H+		0	0
				Products
					CH2OH+ + H+		-114.612	-114.608
					CH3O+ + H+		-114.476	-114.471
					CHOH2+ + H+		-114.487	-114.483
					CH3+ + OH+		-114.557	-114.55
					CH2+ + H2O+		-114.563	-114.555
					HCOH2+ + H2		-114.456	-114.449
					HCOH+ + H2+		-114.523	-114.516
				TS
					TS1		-114.454	-114.449				TS1: CH3OH2+ -> CH2OH22+
					TS2		-114.456	-114.451				TS2: CH3OH2+ -> CH2OH+ + H+
					TS3		-114.479	-114.475				TS3: CH2OH22+ -> CH2OH+ + H+
					TS4		-114.39	-114.385				TS4: CH2OH22+ -> CHOH2+ + H+
					TS5		-114.419	-114.414				TS5: CH2OH22+ -> CH2+ + H2O+
		CH3OH++ (Triplet)	CBS-QB3	Minimum
					CH3OH2+		-114.398	-114.393		CH3OH2+ -> CH2OH22+		-0.01572	-0.016156		-9.86445	-10.138		CH3OH2+ -> TS1		0.053394	0.053003		33.5052	33.2599
					CH2OH22+		-114.414	-114.409		CH3OH2+ -> CH2OH+ + H+		-0.062532	-0.063216		-39.2394	-39.6686		CH3OH2+ -> TS2		0.05287	0.053195		33.1764	33.3804
					CH2OH+		-114.461	-114.456		CH3OH2+ -> CH3O+ + H+		-0.080955	-0.081795		-50.8	-51.3271		CH3OH2+ -> TS3		0.064985	0.064912		40.7787	40.7329
					CH3O+		-114.479	-114.475		CH3OH2+ -> CHOH2+ + H+		-0.065227	-0.065645		-40.9306	-41.1929		CH3OH2+ -> TS4		0.055383	0.055606		34.7534	34.8933
					CHOH2+		-114.463	-114.459		CH3OH2+ -> CH3+ + OH+		-0.157677	-0.155393		-98.9438	-97.5106		CH3OH2+ -> TS5		0.03806	0.038347		23.883	24.0631
					CH3+		-39.3846	-39.3808		CH3OH2+ -> CH2+ + H2O+		-0.164601	-0.161807		-103.289	-101.535		CH3OH2+ -> TS6		0.046885	0.046894		29.4208	29.4264
					CH2+		-38.6902	-38.6863		CH3OH2+ -> HCOH+ + H2+		-0.125153	-0.122766		-78.5347	-77.0368		CH3OH2+ -> TS7		0.024773	0.024536		15.5453	15.3966
					HCOH+		-113.926	-113.923										CH3OH2+ -> TS8		0.042779	0.043261		26.8442	27.1467
					H2O+		-75.8725	-75.8687
					OH+		-75.1711	-75.1678
					H2+		-0.596786	-0.593481
					H+		0	0
				Products
					CH2OH+ + H+		-114.461	-114.456
					CH3O+ + H+		-114.479	-114.475
					CHOH2+ + H+		-114.463	-114.459
					CH3+ + OH+		-114.556	-114.549
					CH2+ + H2O+		-114.563	-114.555
					HCOH+ + H2+		-114.523	-114.516
				TS
					TS1		-114.345	-114.34				TS1: CH3OH2+ -> CH2OH22+
					TS2		-114.345	-114.34				TS2: CH3OH2+ -> CH2OH+ + H+
					TS3		-114.333	-114.328				TS3: CH2OH22+ -> CH2OH+ + H+
					TS4		-114.343	-114.338				TS4: CH3OH2+ -> CH3O+ + H+
					TS5		-114.36	-114.355				TS5: CH2OH22+ -> CHOH2+ + H+
					TS6		-114.351	-114.346				TS6: CH3OH2+ -> CH3+ + OH+
					TS7		-114.373	-114.369				TS7: CH2OH22+ -> CH2+ + H2O+
					TS8		-114.355	-114.35				TS8: CH2OH22+ -> HCOH+ + H2+

## Sheet: CBS-APNO
		Molecular Dynamics of Methanol Monocation (CH3OH+) in Strong Laser Fields Bishnu Thapa and H. Bernhard Schlegel Department of Chemistry, Wayne State University, Detroit, MI 48202, U.S.A.
		Parent Molecule	Level of Theory	Discription	Entities		Total Energy			Reaction Energy										Barrier Energy						a.u. -> kcal/mol
												Reaction Energy in a.u.			Reaction Energy in kcal/mol					Barrier Energy in a.u.			Barrier Energy in kcal/mol
							E (0K)	Enthalpy (298K)				E (0K)	Enthalpy (298K)		E (0K)	Enthalpy (298K)				E (0K)	Enthalpy (298K)		E (0K)	Enthalpy (298K)		627.51
		CH3OH	CBS-APNO	Minimum
					CH3OH		-115.671	-115.667		CH3OH -> CH2OH2		0.129947	0.131634		81.543	82.6016		CH3OH -> TS1		0.133168	0.133269		83.5642	83.6276
					CH2 OH2		-115.541	-115.535		CH3OH -> CH2OH + H		0.150079	0.152162		94.176	95.4831		CH3OH -> TS2		0.142087	0.141964		89.1609	89.0838
					CH2OH		-115.021	-115.017		CH3OH -> CH3O + H		0.165852	0.167891		104.074	105.353
					CH3O		-115.005	-115.001		CH3OH -> CH3 + OH		0.144139	0.147327		90.4486	92.4491
					CH3		-39.8037	-39.7995		CH3OH -> HCOH + H2		0.123121	0.126007		77.2596	79.0706
					HCOH		-114.382	-114.379
					OH		-75.7231	-75.7198
					H2		-1.16528	-1.16198
					H		-0.499946	-0.497585
				Products
					CH2OH + H		-115.521	-115.514
					CH3O + H		-115.505	-115.499
					CH3 + OH		-115.527	-115.519
					HCOH + H2		-115.548	-115.541
				TS
					TS1 (CH2OH2)		-115.538	-115.533
					TS2 (HCOH + H2)		-115.529	-115.525
		CH3OH+	CBS-APNO	Minimum
					CH3OH+		-115.269	-115.265		CH3OH+ -> CH2OH2+		-0.012575	-0.012724		-7.89093	-7.98443		CH3OH+ -> TS1		0.038672	0.037895		24.267	23.7795
					CH2OH2+		-115.282	-115.277		CH3OH+ -> CH2OH+ + H		0.027255	0.028691		17.1028	18.0039		CH3OH+ -> TS2		0.050085	0.04953		31.4288	31.0805
					CH2OH+		-114.742	-114.738		CH3OH+ -> CH3O+ + H		0.159382	0.160932		100.014	100.986
					CH3O+		-114.61	-114.606		CH3OH+ -> CH3+ + OH		0.105006	0.107311		65.8923	67.3387
					HCOH+ (Cis)		-114.057	-114.053		CH3OH+ -> CH2+ + H2O		0.112005	0.114804		70.2842	72.0406
					HCOH+ (Trans)		-114.063	-114.059		CH3OH+ -> HCOH+ + H2 (Cis)		0.046989	0.049379		29.486	30.9858
					CH3+		-39.4413	-39.4375		CH3OH+ -> HCOH+ + H2 (Trans)		0.04108	0.043466		25.7781	27.2753
					CH2 +		-38.7468	-38.743
					H2O		-76.4106	-76.4068
					OH		-75.7231	-75.7198
					H2		-1.16528	-1.16198
					H		-0.499946	-0.497585
				Products
					CH2OH+ + H		-115.242	-115.236
					CH3O+ + H		-115.11	-115.104
					CH3+ + OH		-115.164	-115.157
					CH2+ + H2O		-115.157	-115.15
					HCOH+ + H2 (Cis)		-115.222	-115.215
					HCOH+ + H2 (Trans)		-115.228	-115.221
				TS
					TS1 (CH2OH2+)		-115.231	-115.227
					TS2 (HCOH+ + H2)		-115.219	-115.215
		CH3OH++ (Singlet)	CBS-APNO	Minimum
					CH3OH2+		-114.613	-114.609		CH3OH 2+ -> CH2OH22+		-0.085308	-0.085817		-53.5316	-53.851		CH3OH2+ -> TS1		0.026346	0.026298		16.5324	16.5022
					CH2OH22+		-114.698	-114.694		CH3OH2+ -> CH2OH+ + H+		-0.129083	-0.129766		-81.0008	-81.4294		CH3OH2+ -> TS2		0.03235	0.0325		20.2999	20.3941
					CH2OH+		-114.742	-114.738		CH3OH2+ -> CH3O+ + H+		0.017818	0.01762		11.181	11.0567		CH3OH2+ -> TS3		0.00466	0.004689		2.92419	2.94239
					CH3O+		-114.595	-114.591		CH3OH2+ -> CHOH2+ + H+		-0.00511	-0.005546		-3.20657	-3.48017		CH3OH2+ -> TS4		0.092001	0.092386		57.7315	57.9731
					CHOH2+		-114.618	-114.614		CH3OH2+ -> CH3+ + OH+		-0.05772	-0.055172		-36.2198	-34.621		CH3OH2+ -> TS5		0.072791	0.072999		45.677	45.8076
					CH3+		-39.4413	-39.4375		CH3OH2+ -> CH2+ + H2O+		-0.080844	-0.077799		-50.7304	-48.8196
					CH2+		-38.7468	-38.743		CH3OH2+ -> HCOH2+ + H2		0.027004	0.029614		16.9453	18.5831
					HCOH2+		-113.421	-113.417		CH3OH2+ -> HCOH+ + H2+		-0.041421	-0.038789		-25.9921	-24.3405
					HCOH+		-114.057	-114.053
					H2O+		-75.9472	-75.9434
					OH+		-75.2295	-75.2262
					H2		-1.16528	-1.16198
					H2+		-0.597409	-0.594105
					H+		0	0
				Products
					CH2OH+ + H+		-114.742	-114.738
					CH3O+ + H+		-114.595	-114.591
					CHOH2+ + H+		-114.618	-114.614
					CH3+ + OH+		-114.671	-114.664
					CH2+ + H2O+		-114.694	-114.686
					HCOH2+ + H2		-114.586	-114.579
					HCOH+ + H2+		-114.655	-114.647
				TS
					TS1		-114.587	-114.582				TS1: CH3OH2+ -> CH2OH22+
					TS2		-114.581	-114.576				TS2: CH3OH2+ -> CH2OH+ + H+
					TS3		-114.608	-114.604				TS3: CH2OH22+ -> CH2OH+ + H+
					TS4		-114.521	-114.516				TS4: CH2OH22+ -> CHOH2+ + H+
					TS5		-114.54	-114.536				TS5: CH2OH22+ -> CH2+ + H2O+
		CH3OH++ (Triplet)	CBS-APNO	Minimum
					CH3OH2+		-114.528	-114.524		CH3OH2+ -> CH2OH22+		-0.020018	-0.020006		-12.5615	-12.554		CH3OH2+ -> TS1		0.047513	0.047093		29.8149	29.5513
					CH2OH22+		-114.548	-114.544		CH3OH2+ -> CH2OH+ + H+		-0.063743	-0.064117		-39.9993	-40.234		CH3OH2+ -> TS2		0.049597	0.05009		31.1226	31.432
					CH2OH+		-114.592	-114.588		CH3OH2+ -> CH3O+ + H+		-0.081919	-0.082484		-51.405	-51.7595		CH3OH2+ -> TS3		0.058553	0.059072		36.7426	37.0682
					CH3O+		-114.61	-114.606		CH3OH2+ -> CHOH2+ + H+		-0.067969	-0.068029		-42.6512	-42.6888		CH3OH2+ -> TS4		0.050877	0.051456		31.9258	32.2891
					CHOH2+		-114.596	-114.592		CH3OH2+ -> CH3+ + OH+		-0.158811	-0.15626		-99.6554	-98.0546		CH3OH2+ -> TS5		0.034041	0.03435		21.3611	21.555
					CH3+		-39.4413	-39.4375		CH3OH2+ -> CH2+ + H2O+		-0.165807	-0.162758		-104.045	-102.132		CH3OH2+ -> TS6		0.0472	0.046971		29.6184	29.4747
					CH2+		-38.7468	-38.743		CH3OH2+ -> HCOH+ + H2+		-0.126384	-0.123748		-79.3072	-77.653		CH3OH2+ -> TS7		0.023721	0.023413		14.8852	14.6919
					HCOH+		-114.057	-114.053										CH3OH2+ -> TS8		0.039392	0.040631		24.7189	25.4963
					H2O+		-75.9472	-75.9434
					OH+		-75.2456	-75.2423
					H2+		-0.597409	-0.594105
					H+		0	0
				Products
					CH2OH+ + H+		-114.592	-114.588
					CH3O+ + H+		-114.61	-114.606
					CHOH2+ + H+		-114.596	-114.592
					CH3+ + OH+		-114.687	-114.68
					CH2+ + H2O+		-114.694	-114.686
					HCOH++ + H2		-114.655	-114.647
				TS
					TS1		-114.481	-114.477				TS1: CH3OH2+ -> CH2OH22+
					TS2		-114.479	-114.474				TS2: CH3OH2+ -> CH2OH+ + H+
					TS3		-114.47	-114.465				TS3: CH2OH22+ -> CH2OH+ + H+
					TS4		-114.477	-114.472				TS4: CH3OH2+ -> CH3O+ + H+
					TS5		-114.494	-114.489				TS5: CH2OH22+ -> CHOH2+ + H+
					TS6		-114.481	-114.477				TS6: CH3OH2+ -> CH3+ + OH+
					TS7		-114.504	-114.5				TS7: CH2OH22+ -> CH2+ + H2O+
					TS8		-114.489	-114.483				TS8: CH2OH22+ -> HCOH+ + H2+

## Sheet: G4
		Molecular Dynamics of Methanol Monocation (CH3OH+) in Strong Laser Fields Bishnu Thapa and H. Bernhard Schlegel Department of Chemistry, Wayne State University, Detroit, MI 48202, U.S.A.
		Parent Molecule	Level of Theory	Discription	Entities		Total Energy					Reaction Energy								Barrier Energy						a.u. -> kcal/mol
												Reaction Energy in a.u.			Reaction Energy in kcal/mol					Barrier Energy in a.u.			Barrier Energy in kcal/mol
							E (0K)	Enthalpy (298K)				E (0K)	Enthalpy (298K)		E (0K)	Enthalpy (298K)				E (0K)	Enthalpy (298K)		E (0K)	Enthalpy (298K)		627.51
		CH3OH+	G4	Minimum
					CH3OH+ (Eclipsed)		-115.252	-115.248		CH3OH+ -> CH2OH2+		-0.011494	-0.011262		-7.21259	-7.06701		CH3OH+ -> TS1		0.04106	0.040718		25.7655	25.5509
					CH3OH+ (Staggered)		-115.252	-115.248		CH3OH+ -> CH2OH+ + H		0.028286	0.030116		17.7497	18.8981		CH3OH+ -> TS2		0.051785	0.051724		32.4956	32.4573
					CH2OH2+		-115.263	-115.259		CH3OH+ -> CH3O+ + H		0.158641	0.160589		99.5487	100.771
					CH3O+		-114.592	-114.588		CH3OH+ -> CH3+ + OH		0.104831	0.107535		65.7824	67.4792
					CH2OH+		-114.722	-114.718		CH3OH+ -> CH2+ + H2O		0.111856	0.115066		70.1907	72.205
					HCOH+ (Cis)		-114.037	-114.033		CH3OH+ -> HCOH+ + H2 (Cis)		0.047064	0.049872		29.5331	31.2952
					HCOH+ (Trans)		-114.042	-114.038		CH3OH+ -> HCOH+ + H2 (Trans)		0.041697	0.044489		26.1653	27.9173
					CH3+		-39.4377	-39.4339
					CH2 +		-38.7429	-38.7391
					H2O		-76.3972	-76.3935
					OH		-75.7095	-75.7062
					H2		-1.16802	-1.16471
					H		-0.50142	-0.49906
				Products
					CH2OH+ + H		-115.224	-115.217
					CH3O+ + H		-115.093	-115.087
					CH3+ + OH		-115.147	-115.14
					CH2+ + H2O		-115.14	-115.133
					HCOH+ + H2 (Cis)		-115.205	-115.198
					HCOH+ + H2 (Trans)		-115.21	-115.203
				TS
					TS1 (CH2OH2+)		-115.211	-115.207
					TS2 (HCOH+ + H2)		-115.2	-115.196

## Sheet: Vertical Ionization(0K)
		Molecular Dynamics of Methanol Monocation (CH3OH+) in Strong Laser Fields Bishnu Thapa and H. Bernhard Schlegel Department of Chemistry, Wayne State University, Detroit, MI 48202, U.S.A.
		Parent Molecule	Level of Theory	Entity	Total Energy				Vertical Ionization Energy (0K)				a.u. -> kcal/mol	a.u. -> eV
									in a.u.	in kcal/mol	in eV		627.51	27.2114
		CH3OH	B3LYP/6-31G(d,p)	CH3OH	-115.673		CH3OH -> CH3OH+ + e-		0.386864	242.761	10.5271
				CH3OH+	-115.286		CH3OH -> CH3OH2+ (Singlet) + 2e-		1.18762	745.24	32.3167
				CH3OH2+ (Singlet)	-114.485		CH3OH -> CH3OH2+ (Triplet) + 2e-		1.16086	728.448	31.5885
				CH3OH2+ (Triplet)	-114.512
			CAM-B3LYP/6-31G(d,p)	CH3OH	-115.618		CH3OH -> CH3OH+ + e-		0.389257	244.262	10.5922
				CH3OH+	-115.228		CH3OH -> CH3OH2+ (Singlet) + 2e-		1.19393	749.202	32.4885
				CH3OH2+ (Singlet)	-114.424		CH3OH -> CH3OH2+ (Triplet) + 2e-		1.165	731.049	31.7013
				CH3OH2+ (Triplet)	-114.453
			CBS-QB3	CH3OH	-115.54		CH3OH -> CH3OH+ + e-		0.40844	256.3	11.1142
				CH3OH+	-115.131		CH3OH -> CH3OH2+ (Singlet) + 2e-		1.18869	745.912	32.3458
				CH3OH2+ (Singlet)	-114.351		CH3OH -> CH3OH2+ (Triplet) + 2e-		1.19056	747.086	32.3967
				CH3OH2+ (Triplet)	-114.349
			CBS-APNO	CH3OH	-115.671		CH3OH -> CH3OH+ + e-		0.407041	255.422	11.0762
				CH3OH+	-115.264		CH3OH -> CH3OH2+ (Singlet) + 2e-		1.18747	745.149	32.3127
				CH3OH2+ (Singlet)	-114.483		CH3OH -> CH3OH2+ (Triplet) + 2e-		1.19197	747.974	32.4352
				CH3OH2+ (Triplet)	-114.479
		CH3OH+	B3LYP/6-31G(d,p)	CH3OH+	-115.293		CH3OH+ -> CH3OH2+ (Singlet) + e-		0.76007	476.951	20.6826
				CH3OH2+ (Singlet)	-114.533		CH3OH+ -> CH3OH2+ (Triplet) + e-		0.773581	485.43	21.0502
				CH3OH2+ (Triplet)	-114.52
			CAM-B3LYP/6-31G(d,p)	CH3OH+	-115.237		CH3OH+ -> CH3OH2+ (Singlet) + e-		0.764243	479.57	20.7961
				CH3OH2+ (Singlet)	-114.472		CH3OH+ -> CH3OH2+ (Triplet) + e-		0.776042	486.974	21.1172
				CH3OH2+ (Triplet)	-114.461
			CBS-QB3	CH3OH+	-115.139		CH3OH+ -> CH3OH2+ (Singlet) + e-		0.763273	478.961	20.7697
				CH3OH2+ (Singlet)	-114.375		CH3OH+ -> CH3OH2+ (Triplet) + e-		0.782271	490.882	21.2867
				CH3OH2+ (Triplet)	-114.356
			CBS-APNO	CH3OH+	-115.269		CH3OH+ -> CH3OH2+ (Singlet) + e-		0.765453	480.329	20.829
				CH3OH2+ (Singlet)	-114.504		CH3OH+ -> CH3OH2+ (Triplet) + e-		0.781381	490.324	21.2625
				CH3OH2+ (Triplet)	-114.488
		CH2OH2	B3LYP/6-31G(d,p)	CH2OH2	-115.538		CH2OH2 -> CH2OH2+ + e-		0.300784	188.745	8.18475
				CH2OH2+	-115.237		CH2OH2 -> CH2OH22+ (Singlet) + 2e-		1.0265	644.139	27.9325
				CH2OH22+ (Singlet)	-114.511		CH2OH2 -> CH2OH22+ (Triplet) + 2e-		1.09765	688.784	29.8685
				CH2OH22+ (Triplet)	-114.44
			CAM-B3LYP/6-31G(d,p)	CH2OH2	-115.479		CH2OH2 -> CH2OH2+ + e-		0.295528	185.447	8.04173
				CH2OH2+	-115.184		CH2OH2 -> CH2OH22+ (Singlet) + 2e-		1.02053	640.394	27.7701
				CH2OH22+ (Singlet)	-114.459		CH2OH2 -> CH2OH22+ (Triplet) + 2e-		1.10325	692.297	30.0208
				CH2OH22+ (Triplet)	-114.376
			CBS-QB3	CH2OH2	-115.407		CH2OH2 -> CH2OH2+ + e-		0.312657	196.195	8.50783
				CH2OH2+	-115.095		CH2OH2 -> CH2OH22+ (Singlet) + 2e-		1.02574	643.664	27.9119
				CH2OH22+ (Singlet)	-114.381		CH2OH2 -> CH2OH22+ (Triplet) + 2e-		1.11068	696.964	30.2232
				CH2OH22+ (Triplet)	-114.296
			CBS-APNO	CH2OH2	-115.541		CH2OH2 -> CH2OH2+ + e-		0.316081	198.344	8.60101
				CH2OH2+	-115.225		CH2OH2 -> CH2OH22+ (Singlet) + 2e-		1.0303	646.522	28.0358
				CH2OH22+ (Singlet)	-114.511		CH2OH2 -> CH2OH22+ (Triplet) + 2e-		1.10759	695.025	30.1391
				CH2OH22+ (Triplet)	-114.433
		CH2OH2+	B3LYP/6-31G(d,p)	CH2OH2+	-115.294		CH2OH2+ -> CH2OH22+ (Singlet) + e-		0.616238	386.695	16.7687
				CH2OH22+ (Singlet)	-114.678		CH2OH2+ -> CH2OH22+ (Triplet) + e-		0.802935	503.849	21.849
				CH2OH22+ (Triplet)	-114.491
			CAM-B3LYP/6-31G(d,p)	CH2OH2+	-115.241		CH2OH2+ -> CH2OH22+ (Singlet) + e-		0.61575	386.389	16.7554
				CH2OH22+ (Singlet)	-114.625		CH2OH2+ -> CH2OH22+ (Triplet) + e-		0.803908	504.46	21.8755
				CH2OH22+ (Triplet)	-114.437
			CBS-QB3	CH2OH2+	-115.149		CH2OH2+ -> CH2OH22+ (Singlet) + e-		0.614906	385.859	16.7325
				CH2OH22+ (Singlet)	-114.534		CH2OH2+ -> CH2OH22+ (Triplet) + e-		0.81258	509.902	22.1114
				CH2OH22+ (Triplet)	-114.337
			CBS-APNO	CH2OH2+	-115.282		CH2OH2+ -> CH2OH22+ (Singlet) + e-		0.620858	389.594	16.8944
				CH2OH22+ (Singlet)	-114.661		CH2OH2+ -> CH2OH22+ (Triplet) + e-		0.809924	508.235	22.0392
				CH2OH22+ (Triplet)	-114.472

## Sheet: Adiabatic Ionization(0K)
		Molecular Dynamics of Methanol Monocation (CH3OH+) in Strong Laser Fields Bishnu Thapa and H. Bernhard Schlegel Department of Chemistry, Wayne State University, Detroit, MI 48202, U.S.A.
		Parent Molecule	Level of Theory	Entities	Total Energy			Adiabatic Ionization Energies (0K)				a.u. -> kcal/mol	a.u. -> eV
								in a.u.	in kcal/mol	in eV		627.51	27.2114
		CH3OH/CH3OH+	B3LYP/6-31G(d,p)	CH3OH	-115.673		CH3OH -> CH3OH+ + e-	0.37915	237.92	10.3172
				CH3OH+	-115.293		CH3OH -> CH3OH2+ (Singlet) + 2e-	1.04688	656.927	28.4871
				CH3OH2+ (Singlet)	-114.626		CH3OH -> CH3OH2+ (Triplet) + 2e-	1.11031	696.731	30.2131
				CH3OH2+ (Triplet)	-114.562		CH3OH+ -> CH3OH2+ (Singlet) + e-	0.66773	419.007	18.1699
							CH3OH+ -> CH3OH2+ (Triplet) + e-	0.731161	458.811	19.8959
			CAM-B3LYP/6-31G(d,p)	CH3OH	-115.618		CH3OH -> CH3OH+ + e-	0.380928	239.036	10.3656
				CH3OH+	-115.237		CH3OH -> CH3OH2+ (Singlet) + 2e-	1.04855	657.976	28.5325
				CH3OH2+ (Singlet)	-114.569		CH3OH -> CH3OH2+ (Triplet) + 2e-	1.11209	697.849	30.2616
				CH3OH2+ (Triplet)	-114.505		CH3OH+ -> CH3OH2+ (Singlet) + e-	0.667623	418.94	18.167
							CH3OH+ -> CH3OH2+ (Triplet) + e-	0.731165	458.813	19.896
			CBS-QB3	CH3OH	-115.54		CH3OH -> CH3OH+ + e-	0.401298	251.818	10.9199
				CH3OH+	-115.139		CH3OH -> CH3OH2+ (Singlet) + 2e-	1.05408	661.443	28.6829
				CH3OH2+ (Singlet)	-114.486		CH3OH -> CH3OH2+ (Triplet) + 2e-	1.14187	716.534	31.0718
				CH3OH2+ (Triplet)	-114.398		CH3OH+ -> CH3OH2+ (Singlet) + e-	0.652779	409.625	17.763
							CH3OH+ -> CH3OH2+ (Triplet) + e-	0.740571	464.715	20.152
			CBS-APNO	CH3OH	-115.671		CH3OH -> CH3OH+ + e-	0.401489	251.938	10.9251
				CH3OH+	-115.269		CH3OH -> CH3OH2+ (Singlet) + 2e-	1.05777	663.763	28.7835
				CH3OH2+ (Singlet)	-114.613		CH3OH -> CH3OH2+ (Triplet) + 2e-	1.14274	717.078	31.0954
				CH3OH2+ (Triplet)	-114.528		CH3OH+ -> CH3OH2+ (Singlet) + e-	0.656284	411.824	17.8584
							CH3OH+ -> CH3OH2+ (Triplet) + e-	0.741247	465.14	20.1704
		CH2OH2/CH2OH2+	B3LYP/6-31G(d,p)	CH2OH2	-115.538		CH2OH2 -> CH2OH2+ + e-	0.243183	152.6	6.61735
				CH2OH2+	-115.294		CH3OH+ -> CH3OH2+ (Singlet) + e-	0.826727	518.779	22.4964
				CH2OH22+ (Singlet)	-114.711		CH3OH+ -> CH3OH2+ (Triplet) + e-	0.966818	606.687	26.3085
				CH2OH22+ (Triplet)	-114.571		CH2OH2+ -> CH2OH22+ (Singlet) + e-	0.583544	366.179	15.879
							CH2OH2+ -> CH2OH22+ (Triplet) + e-	0.723635	454.088	19.6911
			CAM-B3LYP/6-31G(d,p)	CH2OH2	-115.479		CH2OH2 -> CH2OH2+ + e-	0.238444	149.626	6.48839
				CH2OH2+	-115.241		CH3OH+ -> CH3OH2+ (Singlet) + e-	0.821779	515.674	22.3618
				CH2OH22+ (Singlet)	-114.658		CH3OH+ -> CH3OH2+ (Triplet) + e-	0.962924	604.244	26.2025
				CH2OH22+ (Triplet)	-114.516		CH2OH2+ -> CH2OH22+ (Singlet) + e-	0.583335	366.048	15.8734
							CH2OH2+ -> CH2OH22+ (Triplet) + e-	0.72448	454.618	19.7141
			CBS-QB3	CH2OH2	-115.407		CH2OH2 -> CH2OH2+ + e-	0.257964	161.875	7.01956
				CH2OH2+	-115.149		CH3OH+ -> CH3OH2+ (Singlet) + e-	0.840317	527.307	22.8662
				CH2OH22+ (Singlet)	-114.567		CH3OH+ -> CH3OH2+ (Triplet) + e-	0.993393	623.364	27.0316
				CH2OH22+ (Triplet)	-114.414		CH2OH2+ -> CH2OH22+ (Singlet) + e-	0.582353	365.432	15.8466
							CH2OH2+ -> CH2OH22+ (Triplet) + e-	0.735429	461.489	20.012
			CBS-APNO	CH2OH2	-115.541		CH2OH2 -> CH2OH2+ + e-	0.258967	162.504	7.04685
				CH2OH2+	-115.282		CH3OH+ -> CH3OH2+ (Singlet) + e-	0.842518	528.688	22.9261
				CH2OH22+ (Singlet)	-114.698		CH3OH+ -> CH3OH2+ (Triplet) + e-	0.992771	622.973	27.0147
				CH2OH22+ (Triplet)	-114.548		CH2OH2+ -> CH2OH22+ (Singlet) + e-	0.583551	366.184	15.8792
							CH2OH2+ -> CH2OH22+ (Triplet) + e-	0.733804	460.469	19.9678
		CH3O	B3LYP/6-31G(d,p)	CH3O	-115.018		CH3O -> CH3O+ + e-	0.398119	249.823	10.8334
				CH3O+	-114.62
			CAM-B3LYP/6-31G(d,p)	CH3O	-114.964		CH3O -> CH3O+ + e-	0.400837	251.529	10.9073
				CH3O+	-114.564
			CBS-QB3	CH3O	-114.874		CH3O -> CH3O+ + e-	0.398882	250.302	10.8541
				CH3O+	-114.476
			CBS-APNO	CH3O	-115.005		CH3O -> CH3O+ + e-	0.409793	257.149	11.151
				CH3O+	-114.595
		CH2OH	B3LYP/6-31G(d,p)	CH2OH	-115.023		CH2OH-> CH2OH+ + e-	0.272926	171.264	7.4267
				CH2OH+	-114.75
			CAM-B3LYP/6-31G(d,p)	CH2OH	-114.971		CH2OH-> CH2OH+ + e-	0.27334	171.523	7.43796
				CH2OH+	-114.698
			CBS-QB3	CH2OH	-114.888		CH2OH-> CH2OH+ + e-	0.276422	173.457	7.52183
				CH2OH+	-114.612
			CBS-APNO	CH2OH	-115.021		CH2OH-> CH2OH+ + e-	0.278665	174.865	7.58286
				CH2OH+	-114.742
		HCOH	B3LYP/6-31G(d,p)	HCOH	-114.382		HCOH-> HCOH+ + e-	0.314556	197.387	8.55951
				HCOH+	-114.068
			CAM-B3LYP/6-31G(d,p)	HCOH	-114.331		HCOH-> HCOH+ + e-	0.312947	196.377	8.51572
				HCOH+	-114.018
			CBS-QB3	HCOH	-114.253		HCOH-> HCOH+ + e-	0.320755	201.277	8.72819
				HCOH+	-113.932
			CBS-APNO	HCOH	-114.382		HCOH-> HCOH+ + e-	0.319448	200.457	8.69263
				HCOH+	-114.063
		CH3	B3LYP/6-31G(d,p)	CH3	-39.8131		CH3 -> CH3+ + e-	0.35983	225.797	9.79148
				CH3+	-39.4533
			CAM-B3LYP/6-31G(d,p)	CH3	-39.7814		CH3 -> CH3+ + e-	0.360342	226.118	9.80541
				CH3+	-39.4211
			CBS-QB3	CH3	-39.7448		CH3 -> CH3+ + e-	0.360151	225.998	9.80021
				CH3+	-39.3846
			CBS-APNO	CH3	-39.8037		CH3 -> CH3+ + e-	0.362356	227.382	9.86021
				CH3+	-39.4413
		CH2	B3LYP/6-31G(d,p)	CH2	-39.1152		CH2 -> CH2+ + e-	0.355589	223.135	9.67607
				CH2+	-38.7597
			CAM-B3LYP/6-31G(d,p)	CH2	-39.0843		CH2 -> CH2+ + e-	0.353984	222.128	9.6324
				CH2+	-38.7303
			CBS-QB3	CH2	-39.0573		CH2 -> CH2+ + e-	0.367149	230.389	9.99064
				CH2+	-38.6902
			CBS-APNO	CH2	-39.1139		CH2 -> CH2+ + e-	0.367155	230.393	9.9908
				CH2+	-38.7468
		H2O	B3LYP/6-31G(d,p)	H2O	-76.3984		H2O -> H2O+ + e-	0.448024	281.139	12.1913
				H2O+	-75.9503
			CAM-B3LYP/6-31G(d,p)	H2O	-76.3695		H2O -> H2O+ + e-	0.447613	280.881	12.1802
				H2O+	-75.9219
			CBS-QB3	H2O	-76.3375		H2O -> H2O+ + e-	0.464994	291.788	12.6531
				H2O+	-75.8725
			CBS-APNO	H2O	-76.4106		H2O -> H2O+ + e-	0.463435	290.81	12.6107
				H2O+	-75.9472
		OH	B3LYP/6-31G(d,p)	OH	-75.7201		OH -> OH+ + e-	0.504593	316.637	13.7307
				OH+	-75.2155
			CAM-B3LYP/6-31G(d,p)	OH	-75.6934		OH -> OH+ + e-	0.504788	316.759	13.736
				OH+	-75.1886
			CBS-QB3	OH	-75.6497		OH -> OH+ + e-	0.476869	299.24	12.9763
				OH+	-75.1729
			CBS-APNO	OH	-75.7231		OH -> OH+ + e-	0.493558	309.712	13.4304
				OH+	-75.2295
